# Supplementary material for: Role of Groucho and Groucho1-like in Regulating Metamorphosis and Ovary Development in Nilaparvata lugens (Stål)
Source: MDPI journal article supplement (doi:10.3390/ijms23031197), 2022-01-21
Supplement: s1 [file s1]

## Supporting Information

**Table S1 Primers for Cloning**

| Name      | Sequence (5'-3')      |
|-----------|-----------------------|
| NIgroF    | TTAACGTGTTTCGTAATGTGT |
| NIgroR    | TTAGATGTAATTTACCTGGA  |
| NIgro1-LR | TACTCGTTCATGTAAGCGC   |
| NIgro1-LR | CACAGTCCTTAGGGCTTTGC  |

**Table S2 Primers for qRT-PCR**

| Name       | Sequence (5'-3')             | Amplification efficiency |
|------------|------------------------------|--------------------------|
| NIActinQF  | TGGACTTCGAGCAGGAAATGG        | 99%                      |
| NIActinQR  | ACGTCGCACTTCATGATCGAG        |                          |
| NIgroQF    | GATCTTCTCGCTGGGCTACT         | 96%                      |
| NIgroQR    | AGCTGGTACTTGTCAGGCTT         |                          |
| NIgro1-LQF | CGCAGAGAGAGCATACACG          | 95%                      |
| NIgro1-LQR | GTGGGCATGGAGAATAGCAA         |                          |
| NIRP15QF   | TAAAAATGGCAGACGAAGAAGAGCCCAA | 93%                      |
| NIRP15QR   | TTCCACGGTTGAAACGTCTGCG       |                          |
| NIRP11QF   | CCGATCGTGTGGCGTTGAAGGG       | 93%                      |
| NIRP11QR   | ATGGCCGACATTCTTCCAGGTCC      |                          |
| NIMetQF    | AAAGCCGGTGTCTTTGAAGT         | 91%                      |
| NIMetQR    | TTTCAGGATTTGGCCGTTCA         |                          |

|                |                        |      |
|----------------|------------------------|------|
| NIβFtz-flQF    | CCATGAGAACCCGTAATCCG   | 95%  |
| NIβFtz-flQR    | CACACTCGAGTCCCTTGATG   |      |
| NI TaiQF       | ATGATCCCAACCACTTCAGC   | 93%  |
| NI TaiQR       | TTCCACTCACACTACCACCA   |      |
| NI Kr-h1QF     | TGATGAGGCACACGATGACT   | 96%  |
| NI Kr-h1QR     | ATGGAAGGCCACATCAAGAG   |      |
| NIE93QF        | AACAACCTCCCGAAATGCAT   | 91%  |
| NIE93QR        | TGCATATGATGGTGGTGGTG   |      |
| NIECRQF        | AAGGCATGTTCCAGCGAAG    | 97%  |
| NIECRQR        | GTGTAGGGCTGGTTGTTGG    |      |
| NIUspAQF       | CGAGGACTGAGCTTGGAGAA   | 100% |
| NIUspAQR       | CTAAAGTTGCCACCGTGAG    |      |
| NIUspBQF       | TGCTTGTCTTCTTATCATCGCT | 92%  |
| NIUspBQR       | GTCCCACCGAATTCAACGAC   |      |
| NI BrQF        | CCAGGCAAACAACCCAATC    | 95%  |
| NI BrQR        | CTACACTGCCCCCTTTCACG   |      |
| NI VgQF        | CACTGCCCCGTGCTGTGCTCTA | 91%  |
| NI VgQRNI BrQR | TGACTTCCTTGCTTTGCTCCC  |      |

**Table S3 Primers for dsRNA Synthesis**

| <b>Name</b>                  | <b>Sequence (5'-3')</b>                           |
|------------------------------|---------------------------------------------------|
| ds <i>GFPF</i>               | GGATCCTAATACGACTCACTATAGGAAGGGCGAGGAGCTGTTCACCG   |
| ds <i>GFP</i> R              | GGATCCTAATACGACTCACTATAGGCAGCAGGACCATGTGATCGCGC   |
| ds <i>NI</i> GroF            | TAATACGACTCACTATAGGGAGACCACCAATCACCTTCTCCGATCCG   |
| ds <i>NI</i> GroR            | TAATACGACTCACTATAGGGAGACCACCTGCAAGGCGATTAAGTTGG   |
| ds <i>NI</i> GroI-LF         | TAATACGACTCACTATAGGGAGACCACGCTTGTGCGACAGTTCCAAG   |
| ds <i>NI</i> GroI-LR         | TAATACGACTCACTATAGGGAGACCACCTAGATTGCTTCCGCGTGGT   |
| ds <i>NI</i> MetF            | TAATACGACTCACTATAGGGAGACCACCAACCAGCAGATGAACCTGA   |
| ds <i>NI</i> MetR            | TAATACGACTCACTATAGGGAGACCACGCAAAGCCTCGTACTCTTGG   |
| ds <i>NI</i> $\beta$ Ftz-fIF | TAATACGACTCACTATAGGGAGACCACCGACCAGATCTCGTTGCTGA   |
| ds <i>NI</i> $\beta$ Ftz-fIR | TAATACGACTCACTATAGGGAGACCACGCAGCCACAAGTAGAATCCG   |
| ds <i>NI</i> TaiF            | TAATACGACTCACTATAGGGAGACCACTTCATTCATTCAGGCTCGGC   |
| ds <i>NI</i> TaiR            | TAATACGACTCACTATAGGGAGACCACCACTCACACTACCACCACT    |
| ds <i>NI</i> Kr-hIF          | TAATACGACTCACTATAGGGAGACCACGTGGGGTTCAGTCCTGAGGA   |
| ds <i>NI</i> Kr-hIR          | TAATACGACTCACTATAGGGAGACCACAGTCGAACACACACCGGAG    |
| ds <i>NI</i> E93F            | TAATACGACTCACTATAGGGAGACCACGCCAGCTTACATGACGAAGA   |
| ds <i>NI</i> E93R            | TAATACGACTCACTATAGGGAGACCACCAGAGTGCAGGATAAATGAC   |
| ds <i>NI</i> ECRF            | TAATACGACTCACTATAGGGAGACCACCTTCGGTTGGTGGGTCTCTC   |
| ds <i>NI</i> ECRR            | TAATACGACTCACTATAGGGAGACCACGCATTGTCCACCTTCATGCG   |
| ds <i>NI</i> UspAF           | TAATACGACTCACTATAGGGAGACCACTCGGTGGTGCTCTTTTGGTG   |
| ds <i>NI</i> UspAR           | TAATACGACTCACTATAGGGAGACCACAAGTGTGGTGATCTACTGGTCA |

|                   |                                                   |
|-------------------|---------------------------------------------------|
| ds <i>NIUspBF</i> | TAATACGACTCACTATAGGGAGACCACTGCTTGTCTTCTTATCATCGCT |
| ds <i>NIUspBR</i> | TAATACGACTCACTATAGGGAGACCACGTAAGTGTGGTGATCTACTGG  |
| ds <i>NIBrF</i>   | TAATACGACTCACTATAGGGAGACCACCGTCATCTCGGACAGTGCTA   |
| ds <i>NIBrR</i>   | TAATACGACTCACTATAGGGAGACCACCGAAGTCCCTGAGACAAAGC   |

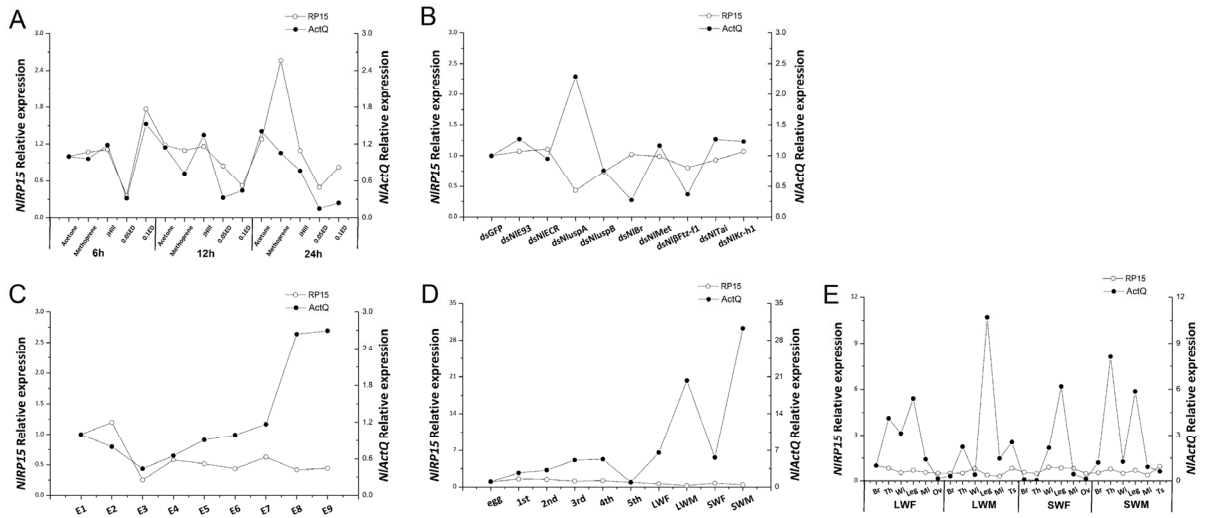

**Figure S1 Stability of the reference genes, *NIRP15* and *NIActin*.**

Here *NIRP11* was used as a reference gene. A-E are different groups of templates. A, JHIII and ecdysone treatment experiment; B, RNAi experiment; C, samples from different embryonic stages, E: Embryo; 1-9 day(s) after eggs were laid; D, developmental stages. Egg: egg; 1st to 5th: 1<sup>st</sup> to 5<sup>th</sup> instar nymph; LWF: long-winged female, LWM: long-winged male, SWF: short-winged female, SWM: short-winged male; E, different tissues. Br: Brain; Th: Thorax; Wi: fore-wing; Leg: Leg; Mi: mid-gut; Ov: Ovary; Ts: testis; LWF: long-winged female, LWM: long-winged male, SWF: short-winged female, SWM: short-winged male.

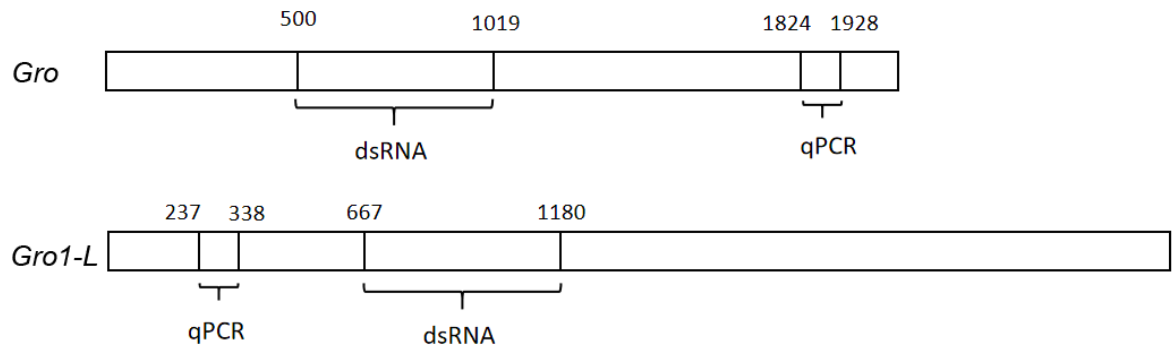

**Figure S2 Region of dsRNA and qRT-PCR primers.**

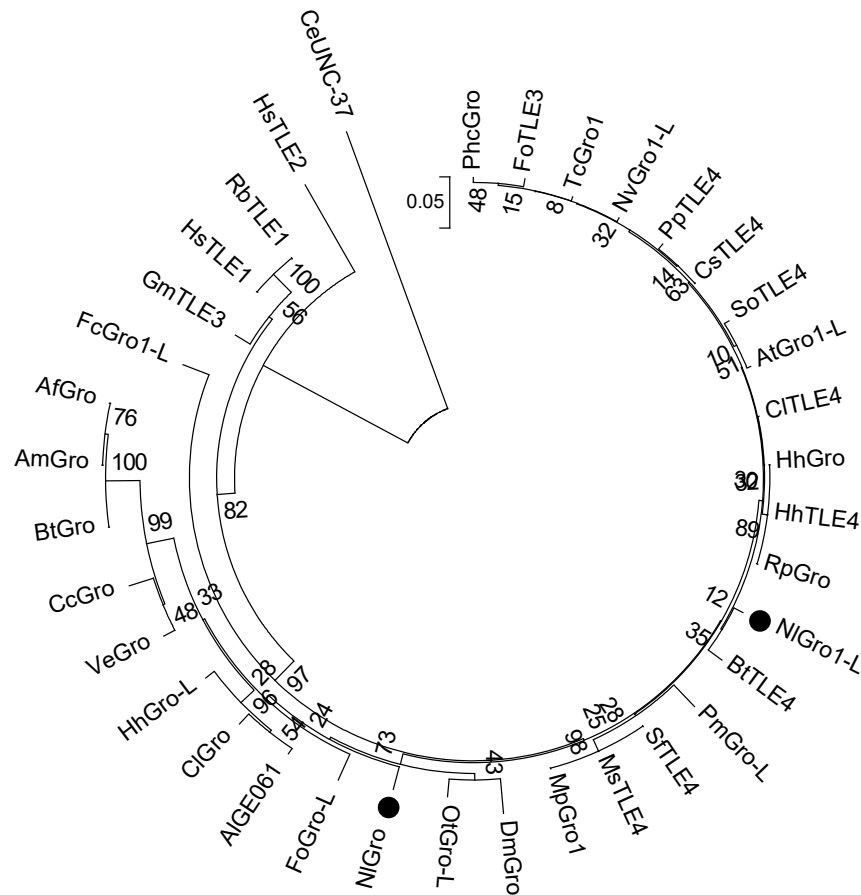

**Figure S3 Phylogenetic analysis of Gro and Gro1-L**

*NiGro*, *Nilaparvata lugens* Gro (XP\_022195835.1); *NiGro1-L*, *Nilaparvata lugens* Gro1-L (XP\_022189353.1); *DmGro*, *Drosophila melanogaster* Gro (NP\_733133.1); *HsTLE1*, *Homo sapiens* TLE1 (NP\_001290032.1); *HsTLE2*, *Homo sapiens* TLE2 (NP\_003251.2); *CeUNC-37*, *Caenorhabditis elegans* UNC-37 (NP\_491932.1); *AlGE061*, *Apolygus lucorum* GE061

(KAE9440368.1); *HhGro-L*, *Halyomorpha halys Gro-L* (XP\_014275615.1); *ClGro*, *Cimex lectularius Gro* (XP\_024082808.1); *FoGro-L*, *Frankliniella occidentalis Gro-L* (XP\_026282736.1); *VeGro*, *Vollenhovia emeryi Gro* (XP\_011882917.1); *CcGro*, *Cephus cinctus Gro* (XP\_024938868.1); *BtGro*, *Bombus terrestris Gro* (XP\_012164601.1); *AmGro*, *Apis mellifera Gro* (XP\_006564194.1); *AfGro*, *Apis florea Gro* (XP\_012342289.1); *FcGro1-L*, *Folsomia candida Gro1-L* (XP\_021968336.1); *GmTLE3*, *Gadus morhua TLE3* (XP\_030232419.1); *RbTLE1*, *Rhinopithecus bieti TLE1* (XP\_017727850.1); *HhGro*, *Halyomorpha halys Gro* (XP\_014282834.1); *CITLE4*, *Cimex lectularius TLE4* (XP\_014258830.1); *HhTLE4*, *Halyomorpha halys TLE4* (XP\_014282837.1); *RpGro*, *Riptortus pedestris Gro* (BAN21009.1); *SoTLE4*, *Sitophilus oryzae TLE4* (XP\_030760956.1); *PpTLE4*, *Photinus pyralis TLE4* (XP\_031338821.1); *TcGro1*, *Tribolium castaneum Gro1* (XP\_008201485.1); *NvGro1-L*, *Nicrophorus vespilloides Gro1-L* (XP\_017770757.1); *BtTLE4*, *Bemisia tabaci TLE4* (XP\_018908679.1); *AtGro1-L*, *Aethina tumida Gro1-L* (XP\_019871485.1); *SfTLE4*, *Sipha flava TLE4* (XP\_025405291.1); *MsTLE4*, *Melanaphis sacchari TLE4* (XP\_025193209.1); *FoTLE3*, *Frankliniella occidentalis TLE3* (XP\_026289757.1); *MpGro1*, *Myzus persicae Gro1* (XP\_022168813.1); *CsTLE4*, *Cryptotermes secundus TLE4* (PNF31698.1); *PmGro-L*, *Papilio machaon Gro-L* (XP\_014357517.1); *PhcGro*, *Pediculus humanus corporis Gro-L* (XP\_002427252.1); *OtGro-L*, *Onthophagus taurus Gro-L* (XP\_022914630.1). The phylogenetic tree was constructed by Neighbor-joining method using the MEGA 6 software. Bootstrap=1000

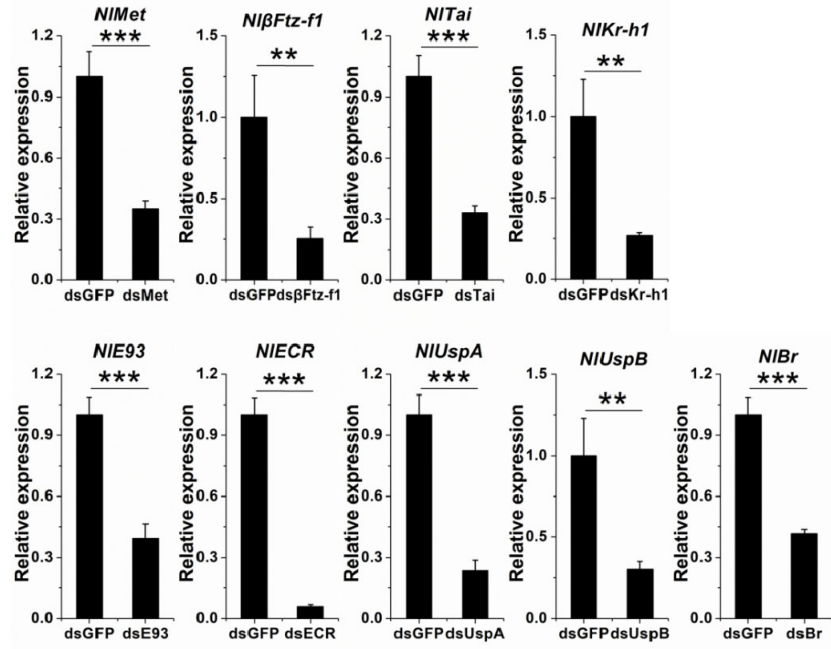

**Figure S4 RNAi efficiency of hormone related genes**

Student's *t* test was used. \*\*:  $P < 0.01$ , \*\*\*:  $P < 0.001$ .

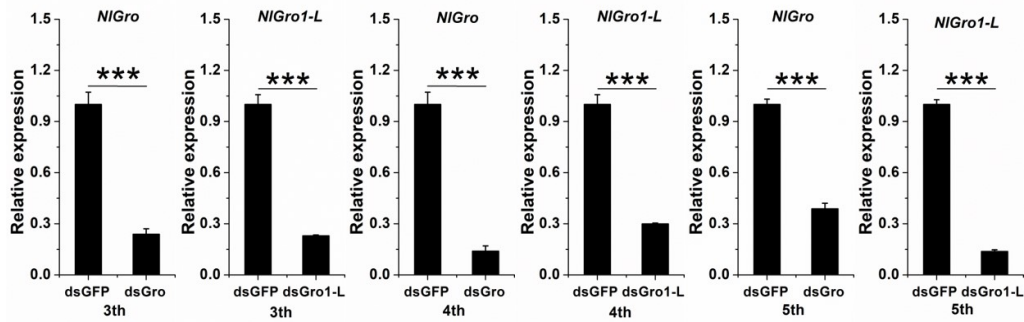

**Figure S5 RNAi efficiency of *NIGro* and *NIGro1-L***

Student's *t* test was used. \*\*\*:  $P < 0.001$ .
